# Supplementary material for: Clinical Evaluation of Acetaminophen–Galgeuntang Interaction Based on Population Approaches
Source: MDPI journal article supplement (doi:10.3390/pharmaceutics12121182), 2020-12-04
Supplement: s1 [file s1]

# Supplementary Material: Clinical Evaluation of Acetaminophen-Galgeuntang Interaction Based on Population Approaches

Quyen Thi Tran, So Jung Park, Hyun-moon Back, Lien Thi Ngo, Duc Tuan Cao, Hung Van Nguyen, Sangkeun Jung, Jung-woo Chae, Yang Chun Park and Hwi-yeol Yun

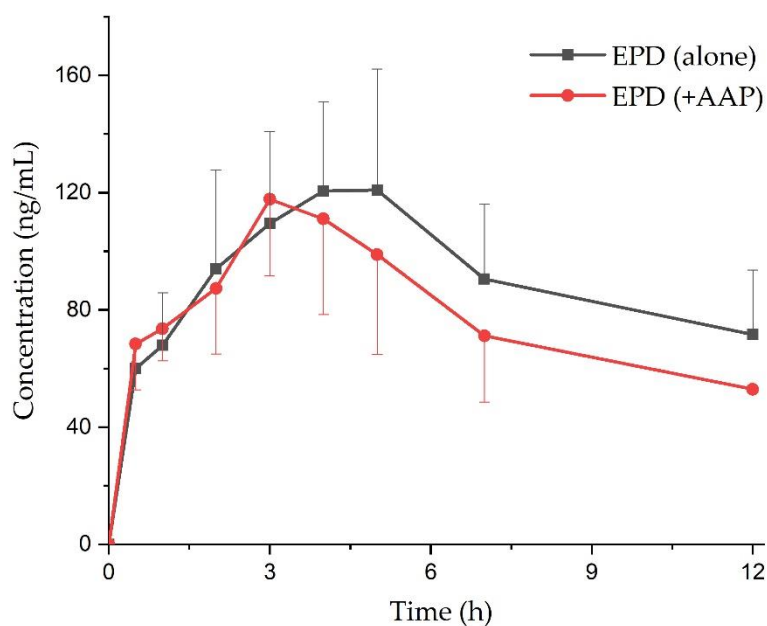

**Figure S1.** Comparison of plasma concentration-time profiles of ephedrine after administration alone or co-administration with acetaminophen (AAP). Each point represents the mean and standard deviation. EPD, ephedrine.

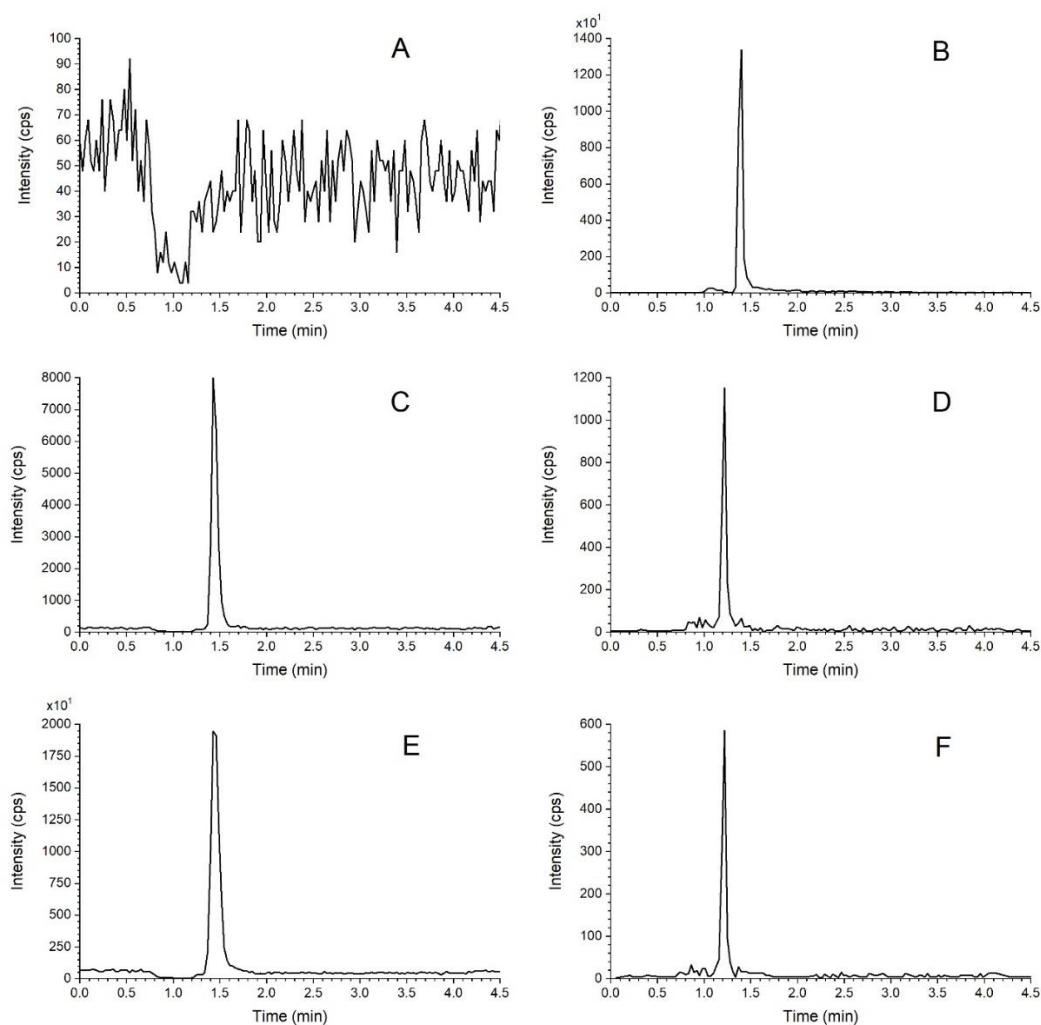

**Figure S2.** Representative chromatogram of blank plasma (A), blank plasma spiked with internal standard (B), standard sample of AAP at dose of 2  $\mu\text{g/mL}$  (C), standard sample of EPD at dose of 0.5  $\mu\text{g/mL}$  (D), real sample of AAP at 3 h after administration combination of AAP and Galgeuntang (GGT) (E), real sample of EPD at 3 h after administration combination of AAP and GGT (F).

**Table S1.** Inclusion and exclusion of participants enrolling clinical trial.

| Criteria           | Contents                                                                                                                                                                     |
|--------------------|------------------------------------------------------------------------------------------------------------------------------------------------------------------------------|
| Inclusion criteria | 1. Men age from 20 to 45 years old                                                                                                                                           |
|                    | 2. Body weight $\geq 55$ kg, and within $\pm 20\%$ IBW [1] (ideal body weight)                                                                                               |
|                    | 3. Subject without any significant chronic disease                                                                                                                           |
|                    | 4. No pathological conditions at time of screening                                                                                                                           |
|                    | 5. Adhere the protocol and sign in an informed consent form                                                                                                                  |
| Exclusion criteria | 1. Inflammatory fever                                                                                                                                                        |
|                    | 2. History of clinically significant hepatic, kidney, digestive system, pulmonary, blood, endocrine, urinary, neurology, musculoskeletal, immune, and cardiovascular systems |
|                    | 3. History of gastrointestinal surgery or gastrointestinal disorders which may importantly affect absorption of drugs                                                        |
|                    | 4. Aspirin-induced asthma                                                                                                                                                    |
|                    | 5. Clinically significant allergies, including GGT components or AAP                                                                                                         |
|                    | 6. Clinically significant vital sign:                                                                                                                                        |
|                    | -Systolic blood pressure $> 140$ or $< 100$ mmHg                                                                                                                             |
|                    | -Diastolic blood pressure $> 90$ or $< 60$ mmHg                                                                                                                              |
|                    | -Heart rate $\geq 100$ beats/min                                                                                                                                             |
|                    | 7. Clinical laboratory test values are outside the accepted normal range:                                                                                                    |
|                    | -AST or ALT $\geq 2$ times to the upper limit value                                                                                                                          |
|                    | -Total bilirubin $> 2$ times the upper limit value                                                                                                                           |
|                    | 8. Use of prescription medicines within 14 days or non-prescription medicines within 7 days before dosing                                                                    |
|                    | 9. History of drug abuse                                                                                                                                                     |
|                    | 10. Renal impairment (Creatinine clearance $< 50$ mL/min)                                                                                                                    |
|                    | 11. Using drugs which related to inhibition or induction of our drugs within 1 month before dosing                                                                           |
|                    | 12. Participated in other study within 3 months before dosing                                                                                                                |
|                    | 13. Bleeding tendency in blood test                                                                                                                                          |
|                    | 14. History of alcohol, smoking abuse:                                                                                                                                       |
|                    | -Alcohol $> 210$ g/weeks                                                                                                                                                     |
|                    | -Smoking $\geq 10$ cigarettes/day                                                                                                                                            |
|                    | 15. Donated blood within 2 months; received or had blood transfusion within 1 month before dosing                                                                            |
|                    | 16. Subjected considered as unsuitable based on medical judgement by investigators                                                                                           |

**Table S2.** Intra-day and inter-day of accuracies and precisions of AAP and EPD.

| Compounds     | Concentration<br>(ng/mL) | Intra-day           |                   | Inter-day           |                   |
|---------------|--------------------------|---------------------|-------------------|---------------------|-------------------|
|               |                          | Precision<br>(%RSD) | Accuracy<br>(%RE) | Precision<br>(%RSD) | Accuracy<br>(%RE) |
| Acetaminophen | 50                       | -1.06               | 6.92              | 3.94                | 4.49              |
|               | 2000                     | -0.853              | 5.58              | 1.17                | 5.11              |
|               | 10,000                   | -0.0405             | 2.54              | -5.21               | 3.85              |
| Ephedrine     | 50                       | 8.99                | 6.44              | 4.65                | 3.44              |
|               | 500                      | -2.79               | 3.50              | -6.06               | 6.25              |
|               | 2500                     | 3.67                | 3.02              | 3.07                | 4.28              |

RSD: relative standard deviation, RE: relative error.

**Table S3.** NCA results of PK parameters of EPD.

| Parameter             | Mean $\pm$ SD                 |                             | <i>p</i> -value |
|-----------------------|-------------------------------|-----------------------------|-----------------|
|                       | EPD (single)<br><i>n</i> = 12 | EPD (+AAP)<br><i>n</i> = 11 |                 |
| $AUC_{0-t}$ (ng h/mL) | 969 $\pm$ 249                 | 833 $\pm$ 217               | <i>p</i> > 0.05 |
| $AUC_{inf}$ (ng h/mL) | 1399 $\pm$ 496                | 1206 $\pm$ 313              | <i>p</i> > 0.05 |
| $C_{max}$ (ng/mL)     | 142 $\pm$ 32.6                | 126 $\pm$ 27.3              | <i>p</i> > 0.05 |
| $T_{max}$ (h)         | 3.38 $\pm$ 1.11               | 3.55 $\pm$ 1.04             | <i>p</i> > 0.05 |
| $t_{1/2}$ (h)         | 5.82 $\pm$ 2.11               | 6.01 $\pm$ 3.22             | <i>p</i> > 0.05 |
| $CL/F$ (mL/h)         | 25.1 $\pm$ 8.86               | 28.0 $\pm$ 8.14             | <i>p</i> > 0.05 |
| $V/F$ (mL/h)          | 195 $\pm$ 60.7                | 225 $\pm$ 79.7              | <i>p</i> > 0.05 |

$AUC_{inf}$ , area under the plasma concentration-time curve from 0 to infinity;  $C_{max}$ , maximum observed plasma concentration;  $T_{max}$ , time to reach maximum observed concentration;  $t_{1/2}$ , plasma half-life associated with terminal slope of a semilogarithmic concentration-time curve;  $CL$ , clearance;  $V$ , volume of distribution;  $F$ , bioavailability; SD, standard deviation.

#### Reference:

1. Syahputra, M.F.; Felicia, V.; Rahmat, R.F.; Budiarto, R. Scheduling Diet for Diabetes Mellitus Patients using Genetic Algorithm. *J. Phys. Conf. Ser.* **2016**, *755*, doi:10.1088/1742-6596/755/1/011001.
